# Supplementary material for: The m6A methyltransferase METTL16 negatively regulates MCP1 expression in mesenchymal stem cells during monocyte recruitment
Source: PubMed Central journal article supplement (PMC10070103; doi:10.1172/jci.insight.162436), 2023-03-22
Supplement: jciinsight-8-162436-s117.pdf [file jciinsight-8-162436-s117.pdf]

## **Supplementary Materials**

### **Supplementary Figures**

**Supplementary Figure S1:** The expression of METTL3, METTL14, ALKBH5 and FTO in MSCs cocultured with monocytes.

**Supplementary Figure S2.** Expression of MCP1 in the METTL3, METTL14, ALKBH5, and FTO knockdown MSCs.

**Supplementary Figure S3.** Efficiency of siRNAs and lentivirus in MSCs.

**Supplementary Figure S4.** Unedited Western blots.

### **Supplemental Tables**

**Supplementary Table S1:** Sequence information of siRNAs.

**Supplementary Table S2:** Primers for qPCR.

## Supplementary Figures:

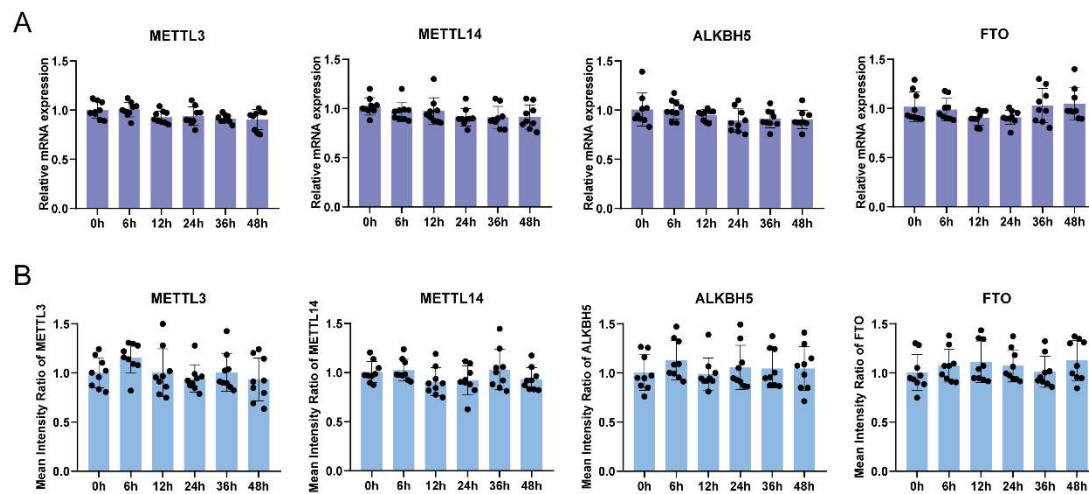

## Supplementary Figure S1. The expression of METTL3, METTL14, ALKBH5 and

**FTO in MSCs cocultured with monocytes. A.** The mRNA expression of *METTL3*,

*METTL14*, *ALKBH5* and *FTO* in MSCs cultured with monocytes at different time

points (n=9). **B.** The mean fluorescence intensity of METTL3, METTL14, ALKBH5

and FTO in MSCs cultured with monocytes at different time points (n=9). Data are

presented as the mean  $\pm$  SD.

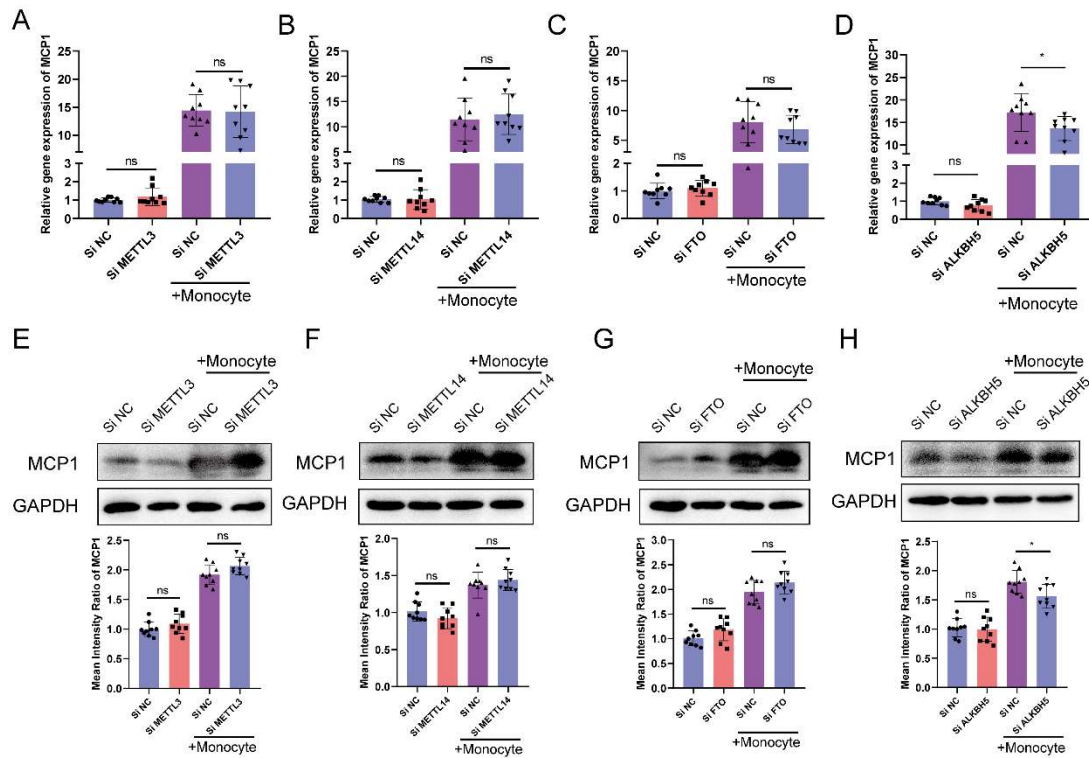

**Supplementary Figure S2. Expression of MCP1 in the METTL3, METTL14, ALKBH5, and FTO knockdown MSCs.** **A.** The mRNA expression of *MCP1* in siNC or siMETTL3 MSCs cultured with or without monocytes (n=9). **B.** The mRNA expression of *MCP1* in siNC or siMETTL14 MSCs cultured with or without monocytes (n=9). **C.** The mRNA expression of *MCP1* in siNC or siFTO MSCs cultured with or without monocytes (n=9). **D.** The mRNA expression of *MCP1* in siNC or siALKBH5 MSCs cultured with or without monocytes (n=9). **E.** Representative blot images and mean fluorescence intensity of MCP1 in siNC or siMETTL3 MSCs cultured with or without monocytes (n=9). **F.** Representative blot images and mean fluorescence intensity of MCP1 in siNC or siMETTL14 MSCs cultured with or without monocytes (n=9). **G.** Representative blot images and mean fluorescence intensity of MCP1 in siNC or siFTO MSCs cultured with or without monocytes (n=9). **H.** Representative blot images and mean fluorescence intensity of MCP1 in siNC or siALKBH5 MSCs

cultured with or without monocytes (n=9). Data are presented as the mean  $\pm$  SD. ns indicates no statistical significance, and \* indicates  $p < 0.05$ .

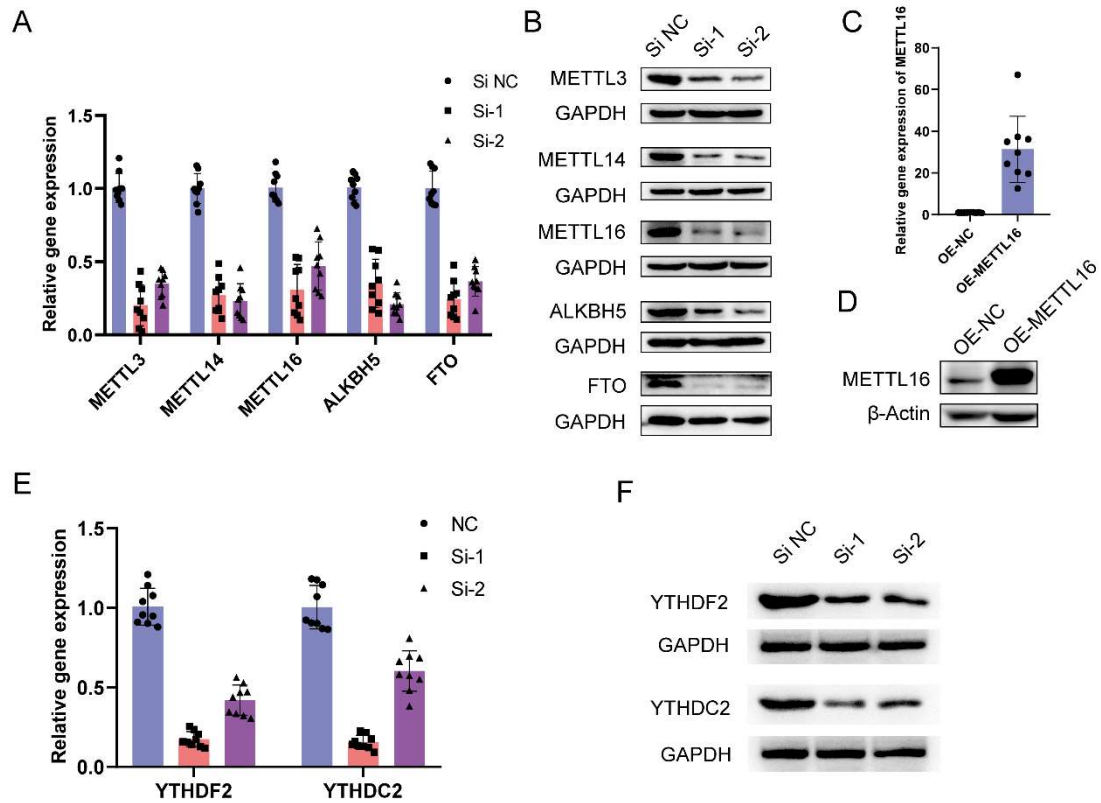

**Supplementary Figure S3. Efficiency of siRNAs and lentivirus in MSCs.** **A.** The mRNA expression of METTL3, METTL14, METTL16, ALKBH5 and FTO in the corresponding siRNA-treated MSCs (n=9). **B.** Representative blot images of METTL3, METTL14, METTL16, ALKBH5 and FTO in the corresponding siRNA-treated MSCs (n=9). **C.** The mRNA expression of *METTL16* in the lentivirus METTL16-treated MSCs (n=9). **D.** Representative blot images of METTL16 in the lentivirus METTL16-treated MSCs (n=9). **E.** The mRNA expression of *YTHDF2* and *YTHDC2* in the corresponding siRNA-treated MSCs (n=9). **F.** Representative blot images of *YTHDF2* and *YTHDC2* in the corresponding siRNA-treated MSCs (n=9). Data are presented as the mean  $\pm$  SD.

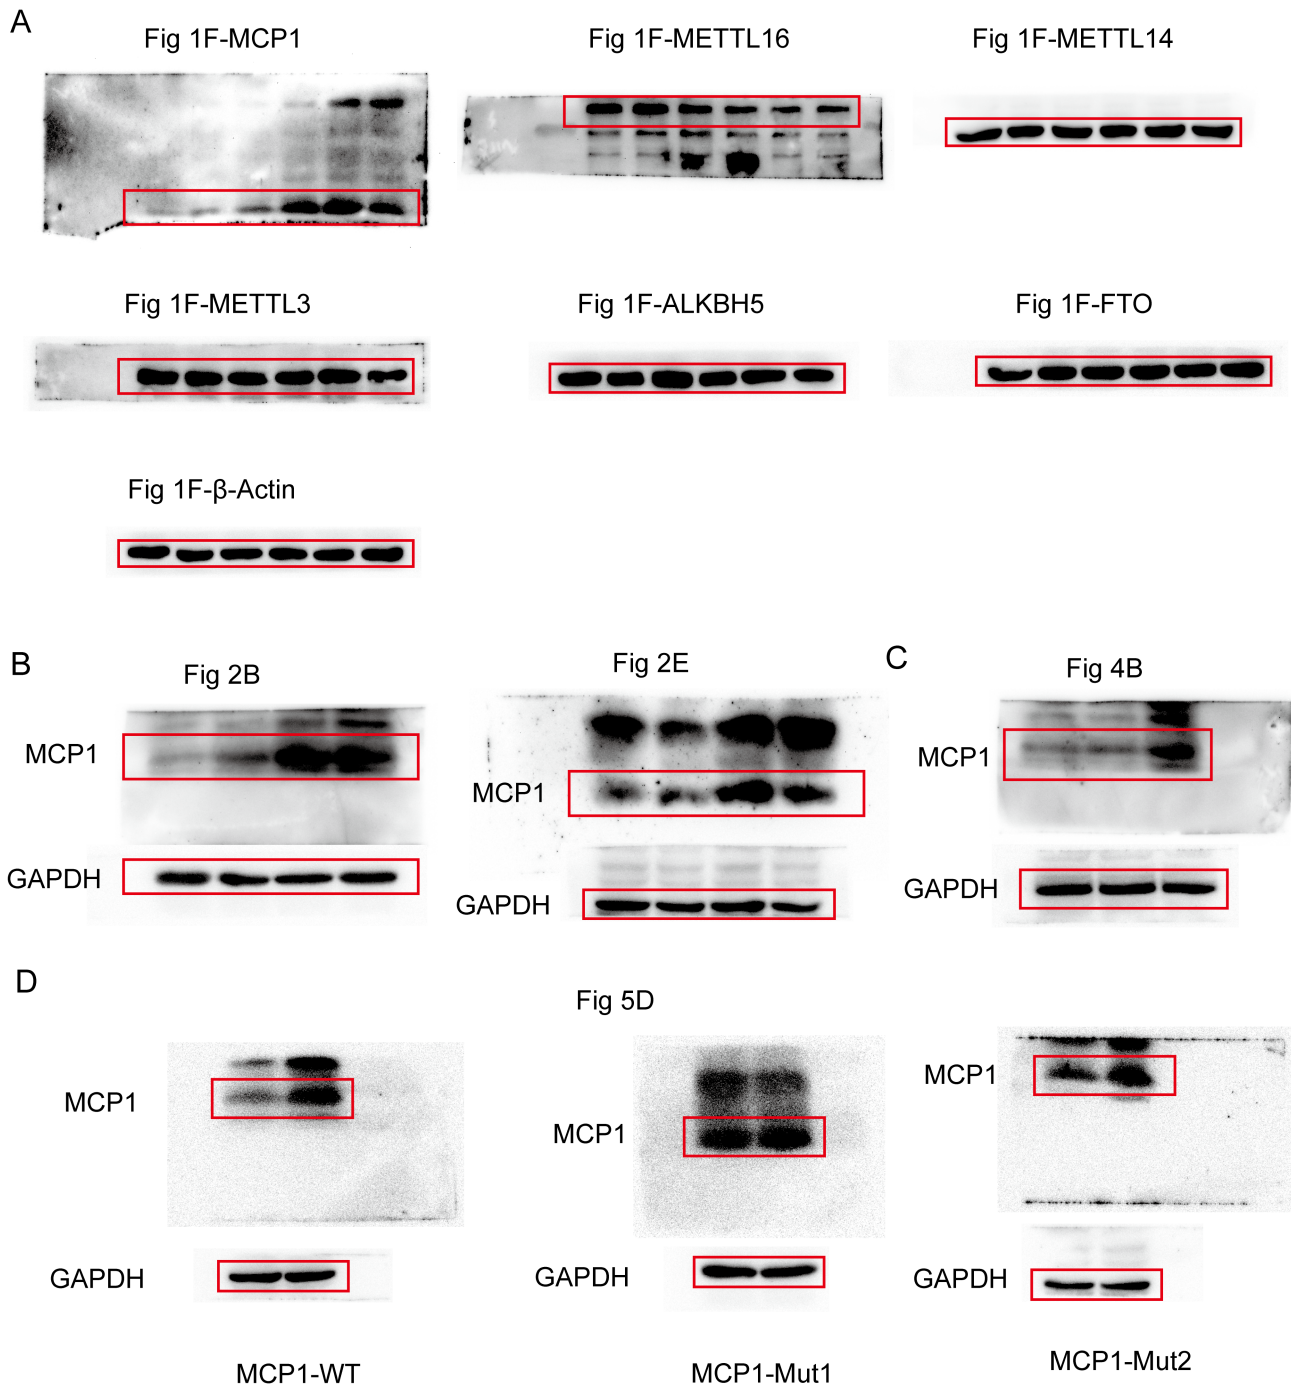

**Supplementary Figure S4. Unedited Western blots.**

**Supplementary Tables:****Supplemental Table S1** Sequence information of siRNAs

|              | Sense (5'-3')          | Antisense (5'-3')     |
|--------------|------------------------|-----------------------|
| Si-NC        | UUCUCCGAACGUGUCACGUTT  | ACGUGACACGUUCGGAGAATT |
| METTL3-si-1  | GGGCCCAAGUGCAAGAAUUTT  | AAUUCUUGCACUUGGGCCCTT |
| METTL3-si-2  | CCUGCAAGUAUGUUCACUATT  | UAGUGAACAUACUUGCAGGTT |
| METTL14-si-1 | GGAUGAAGGAGAGACAGAUTT  | AUCUGUCUCUCCUUCAUCCTT |
| METTL14-si-2 | CCUGGGAAGACUAAGACUUTT  | AAGUCUUAGUCUUCCCAGGTT |
| METTL16-si-1 | CCAUGACAGUCUACAACUUTT  | AAGUUGUAGACUGUCAUGGTT |
| METTL16-si-2 | CCUUGAGACUCAACUAUAUTT  | AUAUAGUUGAGUCUCAAGGTT |
| FTO-si-1     | CAGGAACCUUGGAUUUAUUTT  | AUAUAAUCCAAGGUUCCUGTT |
| FTO-si-2     | GUGGCAGUGUACAGUUUAUATT | UAUAACUGUACACUGCCACTT |
| ALKBH5-si-1  | GACUGUGCUCAGUGGAUAUTT  | AUAUCCACUGAGCACAGUCTT |
| ALKBH5-si-2  | GCUUCAGCUCUGAGAACUATT  | UAGUUCUCAGAGCUGAAGCTT |
| YTHDF2-si-1  | GGUGAAGCUGCUUGGUCUATT  | UAGACCAAGCAGCUUCACCTT |
| YTHDF2-si-2  | GCACAGAAGUUGCAAGCAATT  | UUGCUUGCAACUUCUGUGCTT |
| YTHDC2-si-1  | GCGACUCAACAAUGGCAUATT  | UAUGCCAUUGUUGAGUCGCTT |
| YTHDC2-si-2  | GGAUUUGAUGCAUCUUTT     | AAGAUGCAUGAUCAAAUCCTT |

**Supplemental Table S2 Primers for qPCR**

| Gene     | Forward primer (5'-3') | Reverse primer (5'-3')    |
|----------|------------------------|---------------------------|
| MCP1     | CAGCCAGATGCAATCAATGCC  | TGGAATCCTGAACCCACTTCT     |
| METTL3   | ATTTTCCGGTTAGCCTTCGGG  | TGGATTCCGTAGATCCAAGTGC    |
| METTL14  | GAACACAGAGCTTAAATCCCCA | TGTCAGCTAAACCTACATCCCTG   |
| METTL16  | ACTTTTGCATGTGCAACCCTC  | ACGTTACTTTGGGAACCCCTT     |
| FTO      | GAATTCTATCAGCAGTGGCAGC | GGATGCGAGATAACCGGAGTG     |
| ALKBH5   | CGGCGAAGGCTACACTTACG   | CCACCAGCTTTTGGATCACCA     |
| Pre-MCP1 | GCTTCCAGAGACGGTGACTC   | CCAGATGATCAGCACCAGGG      |
| YTHDF2   | GAGACCAAAGGTCAAGGAAACA | GCAGTATATGCATTATTGGGCCTTG |
| YTHDC2   | CGATACGGGGACCAGAGAGA   | GGTCATCATTGCATGAGCTGTT    |
| GAPDH    | GGAGCGAGATCCCTCCAAAAT  | GGCTGTTGTCATACTTCTCATGG   |
